## RESEARCH ARTICLE

# The Wnt/JNK signaling target gene *alcam* is required for embryonic kidney development

Wiebke Cizelsky<sup>1,2,\*</sup>, Aleksandra Tata<sup>1,2,3,\*</sup>, Michael Kühl<sup>1,‡</sup> and Susanne J. Kühl<sup>1,‡</sup>

## ABSTRACT

Proper development of nephrons is essential for kidney function.  $\beta$ -Catenin-independent Wnt signaling through Fzd8, Inversin, Daam1, RhoA and Myosin is required for nephric tubule morphogenesis. Here, we provide a novel mechanism through which non-canonical Wnt signaling contributes to tubular development. Using *Xenopus laevis* as a model system, we found that the cell-adhesion molecule Alcam is required for proper nephrogenesis and functions downstream of Fzd3 during embryonic kidney development. We found *alcam* expression to be independent of Fzd8 or Inversin, but to be transcriptionally regulated by the  $\beta$ -Catenin-independent Wnt/JNK pathway involving ATF2 and Pax2 in a direct manner. These novel findings indicate that several branches of Wnt signaling are independently required for proximal tubule development. Moreover, our data indicate that regulation of morphogenesis by non-canonical Wnt ligands also involves direct transcriptional responses in addition to the effects on a post-translational level.

**KEY WORDS:** DM-GRASP, *Xenopus laevis*, *alcam*, Kidney, Pronephros

## INTRODUCTION

The *Xenopus* embryonic kidney has become an attractive model system with which to examine nephron formation and to model human kidney diseases. The pronephros has a simple structure and contains one single functional nephron at each body side. The pronephros is formed by inductive signals from adjacent tissues, mesenchymal-epithelial transition (MET), epithelial tubulogenesis, morphogenetic movements and vasculogenesis. Genes that are necessary for *Xenopus* pronephros development are also required for the development of the more-complex mammalian meso- and metanephros (Carroll and Vize, 1999; Dressler, 2006; Ryffel, 2003). Based on molecular studies, the *Xenopus* pronephros can be subdivided into different segments that are homologous to the segments of the metanephric nephrons of mammals (Raciti et al., 2008). In *Xenopus*, the pronephric tubule branches at its most proximal end to generate three ciliated structures called nephrostomes that receive fluid derived from the kidney filter: the glomerulus, which in *Xenopus* is called glomus.

Wnt proteins are extracellular glycoproteins that bind to Frizzled (Fzd) receptors, thereby activating  $\beta$ -Catenin-dependent (canonical) and  $\beta$ -Catenin-independent (non-canonical) signaling pathways

(Kestler and Kuhl, 2008), including the Wnt/ROCK, the Wnt/JNK and the Wnt/ $\text{Ca}^{2+}$  branches (Schulte, 2010). Wnt signaling is crucial for kidney development (Merkel et al., 2007) and misregulation of Wnt signaling contributes to congenital kidney diseases. Mutations in the Wnt signaling mediator Inversin, for example, are the cause of nephronophthisis type II (Otto et al., 2003), and polycystic kidney disease has been linked to gain and loss of canonical, as well as changes in non-canonical, Wnt signaling (Lancaster and Gleeson, 2010; Luyten et al., 2010).

Wnts regulate different aspects of nephrogenesis, including differentiation, proliferation, MET, tubulogenesis and morphogenesis. Fzd8 and Inversin have been shown to be required for morphogenetic movements of the proximal and intermediate tubule (Lienkamp et al., 2010; Satow et al., 2004). This process also involves Daam1, WGEF and RhoA, and regulation of the cytoskeleton (Miller et al., 2011). Recent data indicated that morphogenesis of the tubule requires convergent extension movements that are reached by mediolaterally oriented cell intercalations. This process involves Myosin, a protein regulated by the RhoA-activated kinase ROCK (Lienkamp et al., 2012). *Wnt4* is expressed in the metanephric mesenchyme that develops into the mature nephron through several intermediates (Diez-Roux et al., 2011; Stark et al., 1994). Cultures of metanephric mesenchyme treated with Wnt4 generate nephrons in the absence of the ureteric bud (Kispert et al., 1998). In *Xenopus*, Wnt4 has been shown to be required for proximal tubule development (Naylor and Jones, 2009; Saulnier et al., 2002). Recent evidence indicated that Wnt4 induces nephrogenesis by  $\beta$ -Catenin-independent signaling (Burn et al., 2011; Tanigawa et al., 2011). It remained unclear whether regulation of  $\beta$ -Catenin-independent Wnt signaling in this context also involves transcriptional responses in addition to its effects at the post-translational level.

Alcam is a member of the neuronal immunoglobulin-like domain superfamily of cell-adhesion molecules, and promotes cell adhesion and signaling (Corbel et al., 1996; DeBernardo and Chang, 1996). We previously reported *alcam* expression during *Xenopus* embryogenesis (Gessert et al., 2008), including its expression in the developing pronephros. With respect to kidney development, *Alcam* expression was also reported in the metanephric mesenchyme and the developing tubules in chicken (Tsukamoto et al., 2006). Publicly available microarray data indicate that *Alcam* is also expressed in the developing metanephros of mouse E15.5 embryos (<http://www.gudmap.org/>). Taken together, these data indicate a conserved expression of *alcam* during nephrogenesis. However, analyses regarding a potential function of Alcam during pronephros development are not yet available. In addition, earlier experiments suggested that *alcam* is regulated by non-canonical Wnt signaling (Gessert et al., 2008; Lapointe et al., 2012; Prieve and Moon, 2003). It remained elusive how *alcam* is regulated by  $\beta$ -Catenin-independent Wnt signaling and whether *alcam* is involved in Wnt mediated aspects of nephrogenesis.

By using the *Xenopus laevis* pronephros as a model system, we here show for the first time that Alcam is essential for proper

<sup>1</sup>Institute for Biochemistry and Molecular Biology, Ulm University, Albert-Einstein-Allee 11, Ulm 89081, Germany. <sup>2</sup>International Graduate School in Molecular Medicine Ulm, Ulm 89081, Germany. <sup>3</sup>Department of Neurobiology, Harvard Medical School, 220 Longwood Ave, Boston, MA 02115, USA.

\*These authors contributed equally to this work

‡Authors for correspondence (michael.kuehl@uni-ulm.de; susanne.kuehl@uni-ulm.de)

tubulogenesis. Alcam functions downstream of Fzd3 and is regulated by Wnt/JNK signaling involving ATF2 and Pax2 in a direct manner. These data suggest a new mechanism by which Wnt signaling coordinates pronephric tubulogenesis.

## RESULTS

### Alcam is required for nephron development in the *Xenopus* embryonic kidney

*Alcam* expression in *Xenopus* pronephric tissue starts around stage 22/23 during epithelial tubule formation. Thereafter, *alcam* transcripts were detected throughout the whole pronephric tubule (Fig. 1A; supplementary material Fig. S1B).

To study the potential function of Alcam during *Xenopus* pronephros development, we performed knock down experiments using a well-characterized Alcam antisense morpholino oligonucleotide (MO). This MO is able to block the translation of an *alcam*-GFP fusion construct (Gessert et al., 2008) and reduced the amount of endogenous Alcam protein *in vivo* (supplementary material Fig. S1A). In all following experiments, *gfp* RNA was co-injected as a lineage tracer (Tecza et al., 2011) and manipulation was performed on only one side of the embryo,

leaving the other side unaffected as an internal control. Control MO was injected in all experiments as an injection control.

Alcam-depleted embryos revealed a pronephric phenotype affecting the proximal part of the pronephros, as shown by whole mount *in situ* hybridization against the  $\gamma$ -subunit of the  $\text{Na}^+/\text{K}^+$ -ATPase, *fxyd2*, at stage 36 (Fig. 1B) (Raciti et al., 2008). About 51% of embryos revealed a significant reduction of the *fxyd2* expression domain in the anterior part of the tubule. This phenotype was restored by co-injection of an *alcam* RNA that is not targeted by the Alcam MO (Gessert et al., 2008), indicating the specificity of the Alcam MO-induced effect. A more-detailed quantification of the total tubular surface indicated that the proximal and intermediate tubule convolute was significantly reduced upon Alcam depletion (Fig. 1C). This reduction was similar in extent to that recently observed upon knock down of Inversin (Lienkamp et al., 2010). Again, this phenotype was rescued by *alcam* RNA co-injection. In addition, the three nephrostomes did not properly form and were not separated upon Alcam downregulation, as revealed by *lhx1* staining (Fig. 1D). Furthermore, expression of *foxc1*, a marker gene for the proximal pronephros, was reduced in about 63% of Alcam morphant

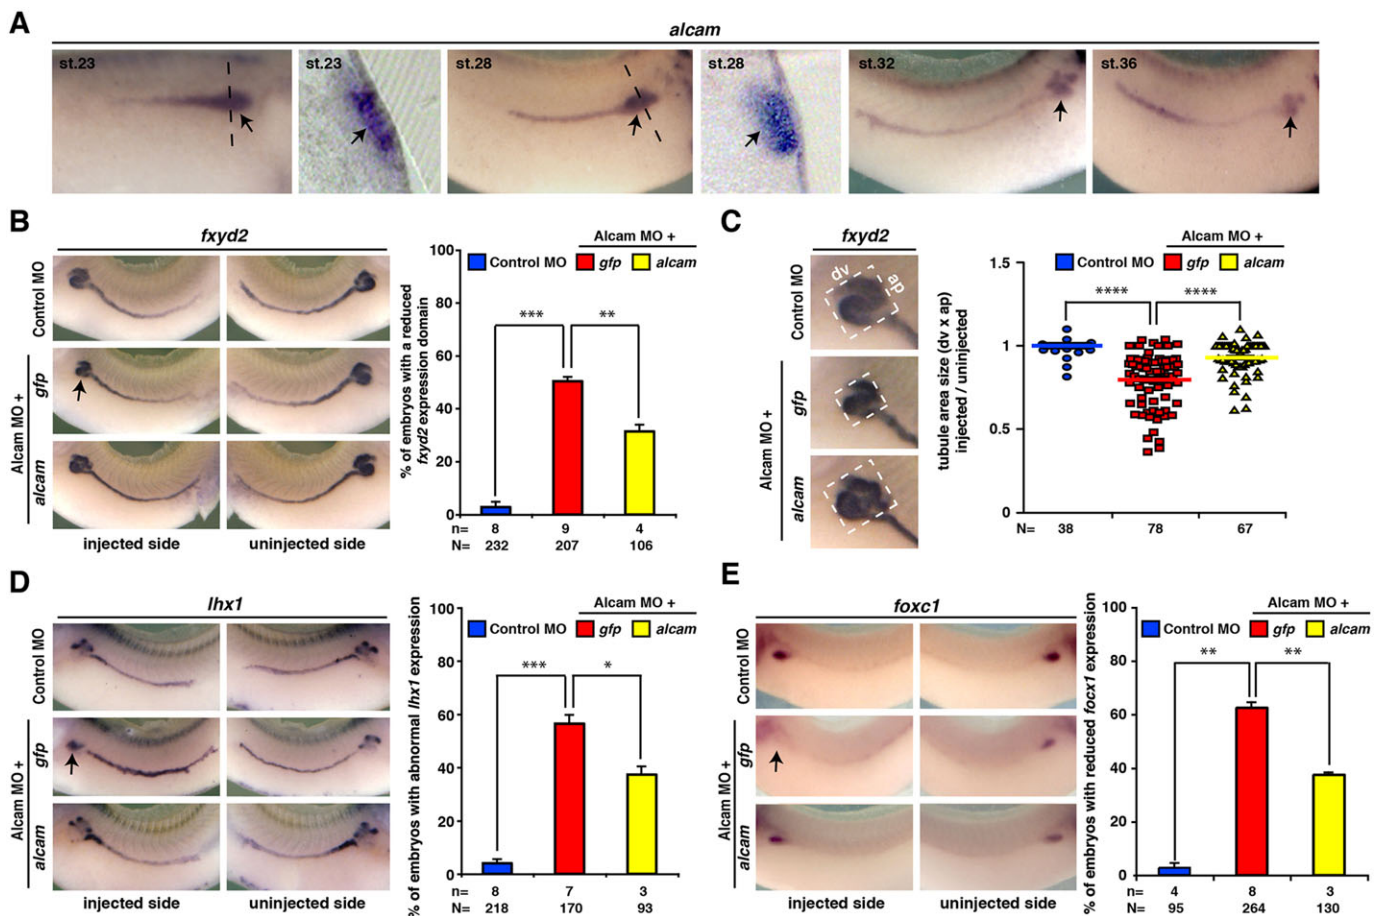

**Fig. 1. Alcam is essential for embryonic kidney development in *Xenopus*.** (A) *Alcam* is expressed during *Xenopus laevis* pronephros development in particular in the anterior proximal part (arrows). Lateral views with anterior towards the right are shown. Dotted lines indicate the level of the transverse sections. (B) *In situ* hybridization at stage 36 indicates that Alcam is required for normal expression of *fxyd2* in the proximal tubule (arrow). Loss of *fxyd2* upon Alcam depletion is rescued by *alcam* RNA co-injection. (C) Quantification of the tubule convolute area demonstrates a significant reduction in size upon loss of Alcam function compared with Control MO-injected embryos. This phenotype is significantly restored by *alcam* co-injection. Measurements of individual embryos are indicated. Median values are also shown. Embryos were analyzed from three independent experiments. (D) At stage 36, injection of Alcam MO leads to a fusion of the three nephrostomes (arrow), which is rescued by *alcam* RNA co-injection. (E) Embryos injected with Alcam MO show a severe reduction in *foxc1* expression (arrow), which is rescued by co-injection of *alcam* RNA. Quantitative representations are shown. Lateral views with anterior towards the left (injected side) or towards the right (uninjected side) are shown. ap, anterior-posterior; dv, dorsal-ventral; n, number of independent batches of embryos; N, number of analyzed embryos in total. \* $P \leq 0.05$ , \*\* $P \leq 0.01$ , \*\*\* $P \leq 0.001$  and \*\*\*\* $P \leq 0.0001$ .

embryos (Fig. 1E). Both phenotypes were restored upon co-injection of *alcam* RNA (Fig. 1D,E). Taken together, these data indicate that a loss of *Alcam* results in disturbed morphogenesis of the proximal and intermediate tubules. The rescue experiments revealed that the phenotype observed upon *Alcam* MO injections is specific.

We next analyzed the *Alcam* MO-induced phenotype in more detail. At an earlier time point of development, expression of pronephros-specific marker genes such as *lhx1*, *dll1*, *wt1*, *wnt4* and *fzd3* was not affected in *Alcam*-depleted embryos (supplementary material Fig. S2). These data indicate that *Alcam* is not required for general specification and early differentiation of the pronephros. Next, we investigated the segmentation of the pronephros. Based on a large scale whole-mount *in situ* hybridization screen, the *Xenopus* pronephros can be subdivided into different segments that are homologous to the different segments of the mammalian metanephric nephron (Raciti et al., 2008) (Fig. 2A). To this end, we used *slc7a8* to label PT1, *slc26a11* to label PT2, *slc5a1* to label PT2 and PT3, *slc12a1* to stain IT1, IT2 and DT1, and *clcnk* to label IT1, IT2, DT1, DT2 and CT at stage 36 (Fig. 2B–F). *Alcam* downregulation led to reduced domains of gene expression, particularly in proximal (PT1–3), intermediate (IT1 and IT2) and distal parts (DT1) of the pronephros, indicating that these segments are established but are smaller in size. The expression of *clcnk* in the connecting tubule was not affected. As expression of all genes was not completely abolished, we conclude that the gross segmentation of the pronephros into proximal, intermediate, distal and connecting tubules is not disturbed in *Alcam*-deficient embryos.

### Loss of Fzd3 phenocopies the loss of Alcam

*Alcam* expression was recently shown to be affected by Wnt signaling (Gessert et al., 2008; Prieve and Moon, 2003). Therefore, we next searched for Wnt ligands and Fzd receptors that are expressed in the pronephros similar to *alcam*. For further experiments, we focused on *wnt4*, *fzd3* and *fzd8* as they are prominently expressed in the anterior part of the *Xenopus* pronephros (Maurus et al., 2005; Satow et al., 2004; Saulnier et al., 2002; Shi et al., 1998) (supplementary material Fig. S1B). *Wnt4* has been shown to be required for proximal tubule development in *Xenopus* (Naylor and Jones, 2009; Saulnier et al., 2002). Furthermore, studies identified Fzd3 as a likely receptor for *Wnt4* (Lyuksytova et al., 2003; Maurus et al., 2005) and Fzd8 has been implicated in proximal tubule morphogenesis (Lienkamp et al., 2010; Satow et al., 2004).

*Alcam*-depleted embryos revealed an abnormal ventral extension of the tubule convolute (Fig. 1B,C) similar to embryos with depletion of the non-canonical Wnt mediators Fzd8 and Inversin (Lienkamp et al., 2010, 2012; Satow et al., 2004), implicating a potential relationship between Fzd8, Inversin and *Alcam*. Interestingly, knock down of neither Fzd8 nor Inversin altered *alcam* or *foxc1* (as one selected other pronephric marker) expression, despite their ability to affect *fxyd2* expression (supplementary material Fig. S3), indicating that *Alcam* is not downstream of Fzd8 or Inversin.

However, depletion of either *Wnt4* or Fzd3 using published MOs (Deardorff et al., 2001; Saulnier et al., 2002) led to a downregulation of *alcam*, as indicated by whole-mount *in situ* hybridization (Fig. 3A) and RT-PCR analyses of animal caps induced towards a pronephric fate by treatment with activin A and retinoic acid (RA) (Fig. 3B). Whereas Fzd3 depletion affected only *alcam* expression in the proximal pronephros, *Wnt4* MO injection led to a more severe phenotype – deleting *alcam* in the entire pronephros (Fig. 3A). Similarly, *Wnt4* depletion resulted in a strong reduction of *lhx1* expression (supplementary material Fig. S4). By contrast, loss of Fzd3 resulted in a fusion of the three nephrostomes but *lhx1*

expression was otherwise normal (Fig. 3E; supplementary material Fig. S4) similar to the phenotype observed upon *Alcam* depletion (compare with Fig. 1D). These data suggest that *alcam* expression in the pronephros depends on *Wnt4* and Fzd3 function. As the phenotype observed upon loss of Fzd3 function phenocopied the loss of *Alcam*, whereas downregulation of *Wnt4* resulted in a broader phenotype, we focused in the rest of our study on characterizing the correlation between Fzd3 and *Alcam*.

To further validate our observation that *alcam* expression is downstream of Fzd3, we analyzed the Fzd3 knock down phenotype in more detail. Loss of Fzd3 led to defects in proximal tubules at stage 36, as indicated by *fxyd2* expression (Fig. 3C). This phenotype was restored by co-injection of *alcam* RNA. Measurements of the tubular surface area revealed that the proximal and intermediate tubule convolute was significantly reduced in size (Fig. 3D). Again, this phenotype was rescued by *alcam* RNA co-injection. Moreover, Fzd3 depletion led to fused nephrostomes (Fig. 3E) and a downregulation of *foxc1* expression (Fig. 3F), similar to the situation observed upon *Alcam* MO injections (compare with Fig. 1D,E). Both phenotypes were restored by *alcam* RNA co-injection. Analyses of segmentation markers indicated that Fzd3 depletion most strongly affected proximal, intermediate and distal tubule development (supplementary material Fig. S5), similar to the *Alcam* depletion phenotype (compare with Fig. 2).

Taken together, these loss of function and rescue data indicate that *alcam* is downstream of Fzd3 and that this regulation is of functional significance. These observations raised the question of which Wnt signaling pathway is *alcam* regulated through?

### Fzd3 regulates alcam expression through JNK1

To investigate whether regulation of *alcam* by Fzd3 occurs through a  $\beta$ -Catenin-dependent or -independent Wnt pathway, we made use of two well-described Dishevelled (*dsh*) deletion constructs designated *dsh $\Delta$ DIX* and *dsh $\Delta$ DEP*. *Dsh $\Delta$ DEP* activates  $\beta$ -Catenin-dependent Wnt signaling, whereas *dsh $\Delta$ DIX* acts through  $\beta$ -Catenin-independent Wnt signaling branches (Boutros et al., 1998; Itoh et al., 2000; Kishida et al., 1999; Li et al., 1999).

We injected Fzd3 MO, together with either *dsh $\Delta$ DIX* or *dsh $\Delta$ DEP* RNA, and monitored expression of *alcam*. Interestingly, *alcam* downregulation by Fzd3 depletion could only be restored by co-injecting *dsh $\Delta$ DIX* but not *dsh $\Delta$ DEP* RNA (Fig. 4A), indicating a regulation of *alcam* through  $\beta$ -Catenin-independent Wnt signaling. As *dsh $\Delta$ DIX* activates the non-canonical Wnt signaling mediator jun N-terminal kinase JNK (Boutros et al., 1998), we aimed to rescue the Fzd3 MO phenotype through introducing a constitutively active version of JNK (*caJNK1*) (Lei et al., 2002). *caJNK1* RNA injection led to a modest but significant rescue of *alcam* expression (Fig. 4B). Injection of higher *caJNK1* amounts is not possible due to gastrulation defects. These data indicate that *alcam* regulation by Fzd3 occurs through  $\beta$ -Catenin-independent Wnt/JNK signaling.

### The Alcam promoter contains a Fzd3 response element

We next analyzed the 5' upstream regulatory region of *alcam*. We determined the transcriptional start site by 5'RACE and isolated a genomic region upstream of the transcription initiation site (supplementary material Fig. S6). We started our analysis with a 3.1 kb fragment including the 5'UTR and the regulatory region 2.7 kb upstream of the transcription start site that we cloned in front of the luciferase reporter gene (–2.7 kb-luc) (Fig. 5A). This construct revealed transcriptional activity in untreated animal cap cells (ACs) of *Xenopus* embryos (Fig. 5B). Upon inducing a pronephric fate in ACs by treatment with activin A and RA (retinoic



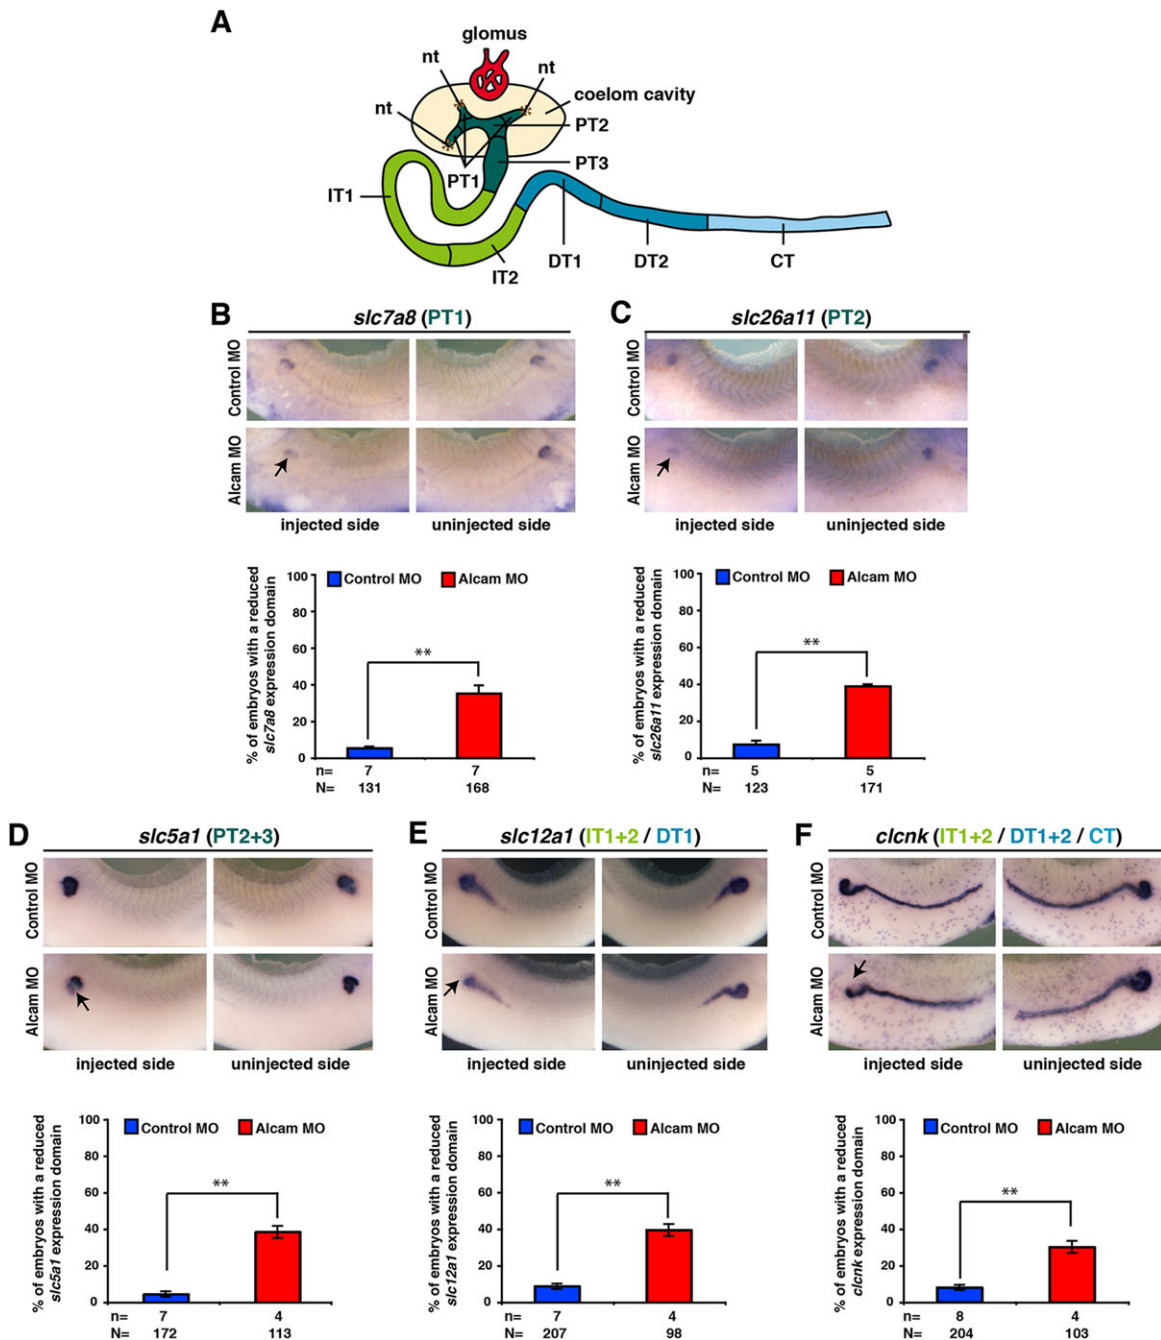

**Fig. 2. Alcam depletion has no effect on pronephric segmentation.** (A) A *Xenopus* pronephros (based on Raciti et al., 2008). nt, nephrostome; PT, proximal tubule; IT, intermediate tubule; DT, distal tubule; CT, connecting tubule. (B-F) At stage 36, the embryos injected with Alcam MO reveal a reduction in the expression domain of: (B) the amino acid transporter *slc7a8* (a marker for PT1 of the proximal tubule); (C) the anion exchanger *slc26a11* (a marker for PT2 of the proximal tubule); (D) the sodium/glucose co-transporter *slc5a1* (a marker for PT2 and PT3 of the proximal tubule); (E) the sodium/potassium/chloride co-transporter *slc12a1* (a marker for IT1 and IT2 of the intermediate and DT1 of the distal tubule); (F) the voltage sensitive chloride channel *clcnk* (a marker for IT1 and IT2 of the intermediate, DT1 and DT2 of the distal, and the connecting tubule) on the injected side. Whereas Alcam depletion results in reduced expression domains of the marker genes in PT1-3, IT1-2 and DT1 (arrows), the uninjected or control MO-injected side of the embryos display no pronephric phenotype. Quantitative representations are shown. Lateral views with anterior towards the left (injected side) or towards the right (uninjected side) are shown. n, number of independent batches of embryos; N, number of analyzed embryos in total. \*\* $P \leq 0.01$ .

acid), we observed a strong upregulation of promoter activity in comparison with untreated ACs (Fig. 5B).

We next tested whether the *alcam* regulatory region responds to a loss of Fzd3 and co-injected the  $-2.7$  kb-luc construct together with Fzd3 MO to measure luciferase activity in pronephric ACs. Inhibiting Fzd3 function led to a significant reduction of luciferase activity (Fig. 5C). These results indicate that the isolated  $-2.7$  kb

upstream fragment contains regulatory elements required for *alcam* regulation by Fzd3. We next deleted parts of the fragment generating  $-2.2$  kb and  $-0.8$  kb fragments fused to the reporter gene ( $-2.2$  kb-luc and  $-0.8$  kb-luc; Fig. 5A). Both fragments revealed transcriptional activity in pronephric ACs, although at lower levels (Fig. 5B). Whereas the  $-2.2$  kb-luc fragment responded to Fzd3 downregulation (Fig. 5D), the  $-0.8$  kb-luc

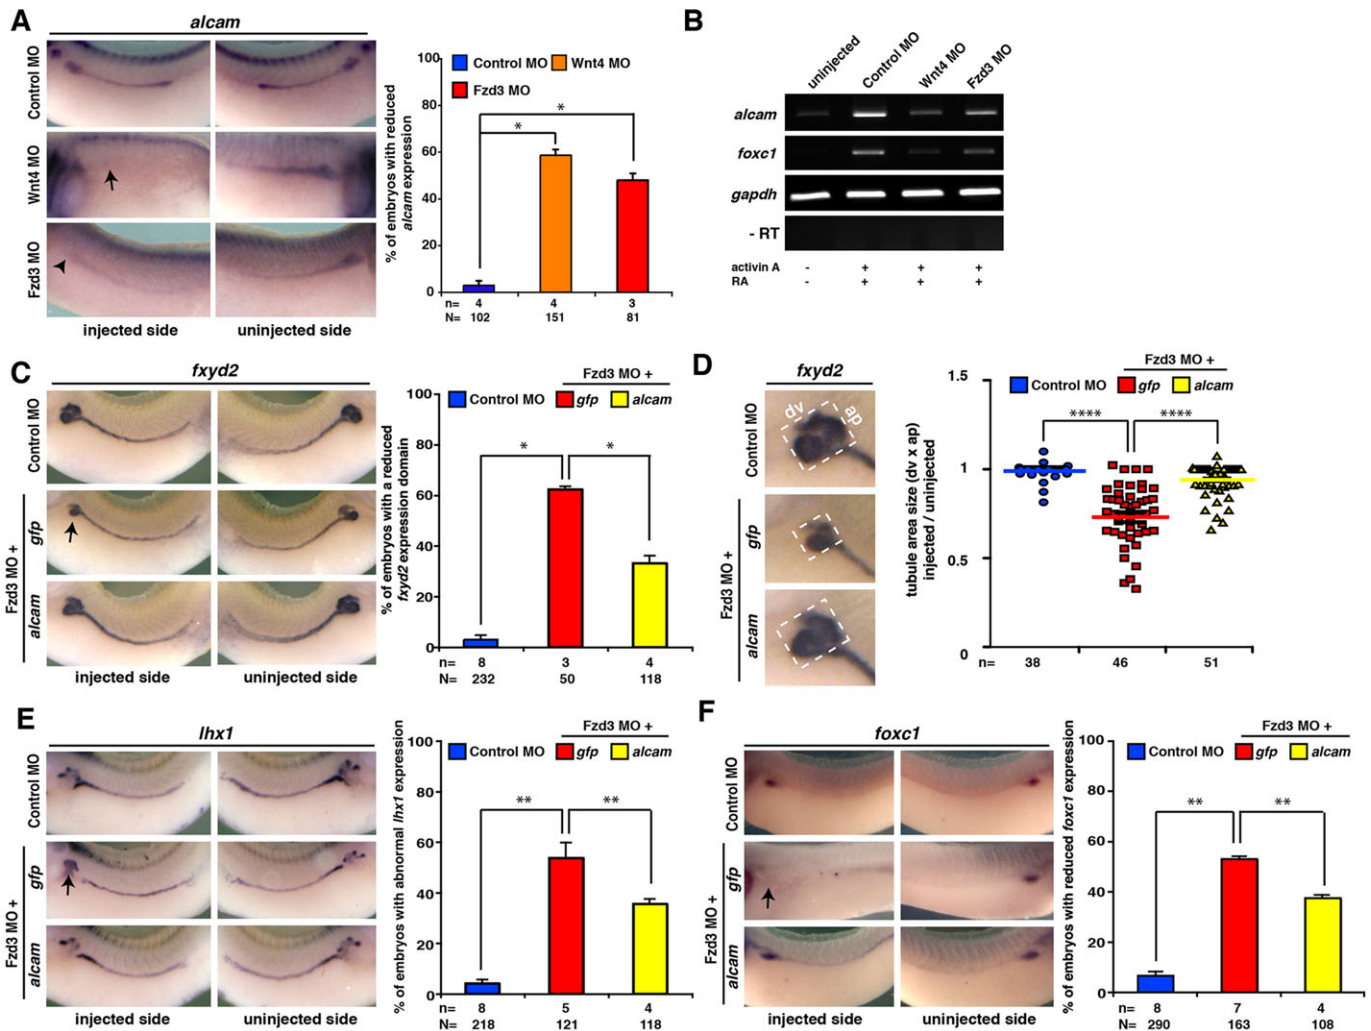

**Fig. 3. Fzd3 depletion phenocopies the loss of Alcam phenotype.** (A) Loss of Wnt4 function results in a severe reduction of *alcam* expression in the entire pronephros (arrow). Fzd3 depletion leads to *alcam* downregulation only in the proximal part of the pronephros (arrowhead). (B) Animal cap assays show that the expression of *alcam* and *foxc1* are impaired upon loss of Wnt4 or Fzd3. The effect of Wnt4 MO injection is stronger compared with Fzd3 MO injection. (C) Whole-mount *in situ* hybridization at stage 36 indicates that Fzd3 is required for the normal *fxyd2* expression in the proximal tubule (arrow). Loss of *fxyd2* upon Fzd3 depletion is rescued by *alcam* RNA co-injection. (D) Quantification of the tubule convolute area demonstrates a significant reduction in size upon loss of Fzd3 function compared with Control MO-injected embryos. This phenotype is significantly restored by *alcam* co-injection. Measurements of individual embryos are indicated. Median values are also shown. Embryos were analyzed from three independent experiments. Data for Control MO are the same as in Fig. 1C, as these experiments were carried out in parallel. (E) At stage 36, injection of Fzd3 MO leads to a fusion of the three nephrostomes (arrow), which is rescued by *alcam* RNA co-injection. (F) Embryos injected with Fzd3 MO show a severe reduction in *foxc1* expression (arrow), which is rescued by co-injection of *alcam* RNA. Quantitative representations are shown. Lateral views with anterior towards the left (injected side) or towards the right (uninjected side) are shown. ap, anterior-posterior; dv, dorsal-ventral; n, number of independent batches of embryos; N, number of analyzed embryos in total. \* $P \leq 0.05$ , \*\* $P \leq 0.001$ , \*\*\*\* $P \leq 0.0001$ .

construct did not (Fig. 5E). These data indicate that the Fzd3 response element is likely located between  $-2152$  and  $-781$  of the *alcam* promoter.

We then tested whether the  $-2.7$  kb-luc construct responds to canonical or non-canonical Wnt signaling. As in *Xenopus* ACs, the  $-2.7$  kb-luc construct showed an activity in MDCK (Madin Darby canine kidney) cells (Fig. 6A). Treatment of MDCK cells with Wnt11 (Fig. 6C), a non-canonical Wnt ligand, but not Wnt3a (Fig. 6B), a canonical Wnt ligand, resulted in a significant upregulation of reporter activity. Also in HEK293 cells, treatment with Wnt3a or the GSK3 $\beta$  inhibitor BIO did not result in any activation of the *alcam* reporter, although both treatments activate the Wnt/ $\beta$ -Catenin reporter TOPFlash (supplementary material

Fig. S7A,B). Transfecting MDCK cells with *caJNK1*, however, activated  $-2.7$  kb-luc (Fig. 6C). Similarly, *caJNK1* activated the reporter in HEK293 cells (supplementary material Fig. S7C). Other non-canonical Wnt signaling mediators such as constitutively active versions of CamKII (Kühl et al., 2000) or NF-AT (Borchers et al., 2006) had no effect on  $-2.7$  kb-luc (supplementary material Fig. S7C). To confirm these observations in *Xenopus*, we used the pronephric AC system and investigated the influence of modulating JNK activity on the *alcam* promoter. Indeed, inhibition of JNK by SP600125 treatment led to a significant downregulation (Fig. 6D), whereas overexpression of *caJNK1* resulted in an upregulation of promoter activity (Fig. 6E). Taken together, these results obtained in different cell lines

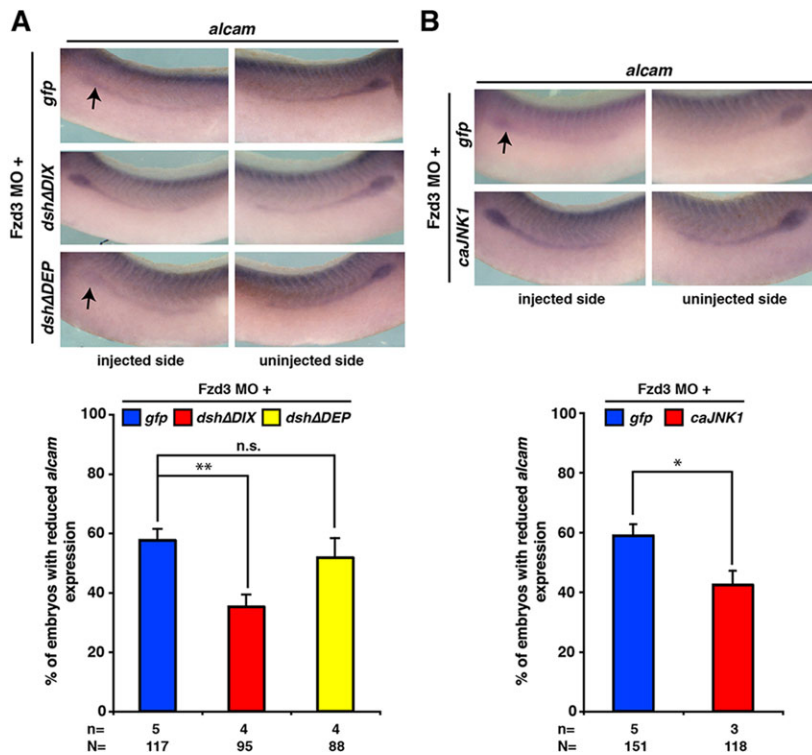

**Fig. 4. Fzd3 regulates *alcam* expression through JNK1.** (A) Fzd3 depletion leads to a downregulation of *alcam* expression (arrow), which was rescued by *dshΔDIX* but not by *dshΔDEP* (arrow). (B) Depletion of Fzd3 results in a reduction of *alcam* (arrow). This phenotype is significantly rescued by co-injection of a constitutively active form of the Wnt signaling mediator *JNK* (*caJNK1*). Lateral views with anterior towards the left (injected side) or towards the right (uninjected side) are shown. Quantitative representations are shown. n, number of independent experiments; N, number of analyzed embryos in total; n.s., not significant. \* $P < 0.05$ , \*\* $P < 0.01$ .

supported our findings in whole embryos that the *alcam* reporter responds to non-canonical Wnt/JNK signaling.

### Pax2 regulates the Fzd3 response element

Our experiments identified a Fzd3 responsive element (Fzd3RE) located between  $-2152$  and  $-781$  of the *alcam* promoter (Fig. 5). A close inspection of this region revealed the presence of seven AP1/ATF2 and two Pax2 sites clustered in a small region of 265 nucleotides (supplementary material Fig. S6). Deleting this region within  $-2.7$  kb-luc to generate  $-2.7$  kbΔ-luc resulted in a dramatically reduced promoter activity (Fig. 5B,F). Moreover  $-2.7$  kbΔ-luc no longer responded to Fzd3 depletion (Fig. 5F).

Previous work by others has linked ATF2 to  $\beta$ -Catenin-independent Wnt signaling (Schambony and Wedlich, 2007). Chromatin immunoprecipitation indicated that ATF2 binds in the 265 bp region that depends on Fzd3 function, supporting a role for ATF2 in *alcam* regulation (Fig. 7A). Pax2 is another transcription factor that is activated by  $\beta$ -Catenin-independent Wnt signaling at the post-translational level by phosphorylation through JNK. These earlier studies additionally indicated that phosphorylation of Pax2 by JNK correlates with an increased transactivation of a *pax2*-dependent reporter (Cai et al., 2002). These observations and the identification of Pax2-binding sites in the *alcam* regulatory region raised the possibility that Pax2 is a positive regulator of *alcam*. We tested this possibility by co-transfecting the *alcam* reporter together with *pax2* in MDCK cells. Pax2 activated  $-2.7$  kb-luc, whereas  $-2.7$  kbΔ-luc did not respond to *pax2* transfection (Fig. 7B), suggesting a direct regulation of *alcam* by Pax2. In line with this idea, we could show Pax2 binding to the regulatory region by chromatin immunoprecipitation. As in the case of ATF2, Pax2 binding was at least in part dependent on Fzd3 function (Fig. 7A). This outcome raised the issue of whether the loss of *alcam* expression upon Fzd3 depletion could be rescued by forced overexpression of Pax2 *in vivo*, thereby overcoming the reduced binding affinity of Pax2 to the promoter as well as its

reduced transcriptional activity. We therefore injected Fzd3 MO together with *pax2* RNA and monitored *alcam* expression. Indeed, we observed a rescue of *alcam* downregulation (Fig. 7C). Taken together, our data indicate regulation of *alcam* expression by Wnt/JNK signaling that involves ATF2 and Pax2 (Fig. 7D).

In combination with the functional analyses, our data suggests a novel mechanism how non-canonical Wnt signaling regulates *alcam* expression and thereby tubular development in the embryonic kidney.

### DISCUSSION

Our data make the following novel contributions: (1) we show for the first time, that the cell-adhesion molecule Alcam is required for nephrogenesis; (2) we demonstrate that *alcam* expression in the pronephros depends on Fzd3 function and the activation of a  $\beta$ -Catenin-independent Wnt signaling pathway; and (3) we identify for the first time a response element in the regulatory region of a direct target gene of non-canonical Wnt signaling.

### Requirement of Alcam for nephrogenesis

Tubule formation during nephrogenesis requires the transition of mesenchymal cells into epithelial cells (mesenchymal-epithelial transition, called MET). Previous findings suggested Alcam to be involved in adherens junction formation (Choe et al., 2013; Jannie et al., 2012) and in the establishment of epithelial apical-basal polarity, two processes occurring during MET. Later during tubulogenesis, the proximal part enlarges the surface area that is required for proper and efficient reabsorption of water, ions and small compounds. This is achieved by proliferation of tubular cells and morphogenetic movements (Fischer et al., 2006; Karner et al., 2009; Lienkamp et al., 2012). These convergent extension movements require the action of several Wnt components, such as Fzd8 or Inversin (Lienkamp et al., 2010). The similarity between our Alcam and Fzd8/Inversin MO phenotypes suggests that Alcam might also be required for these movements. A detailed analysis of



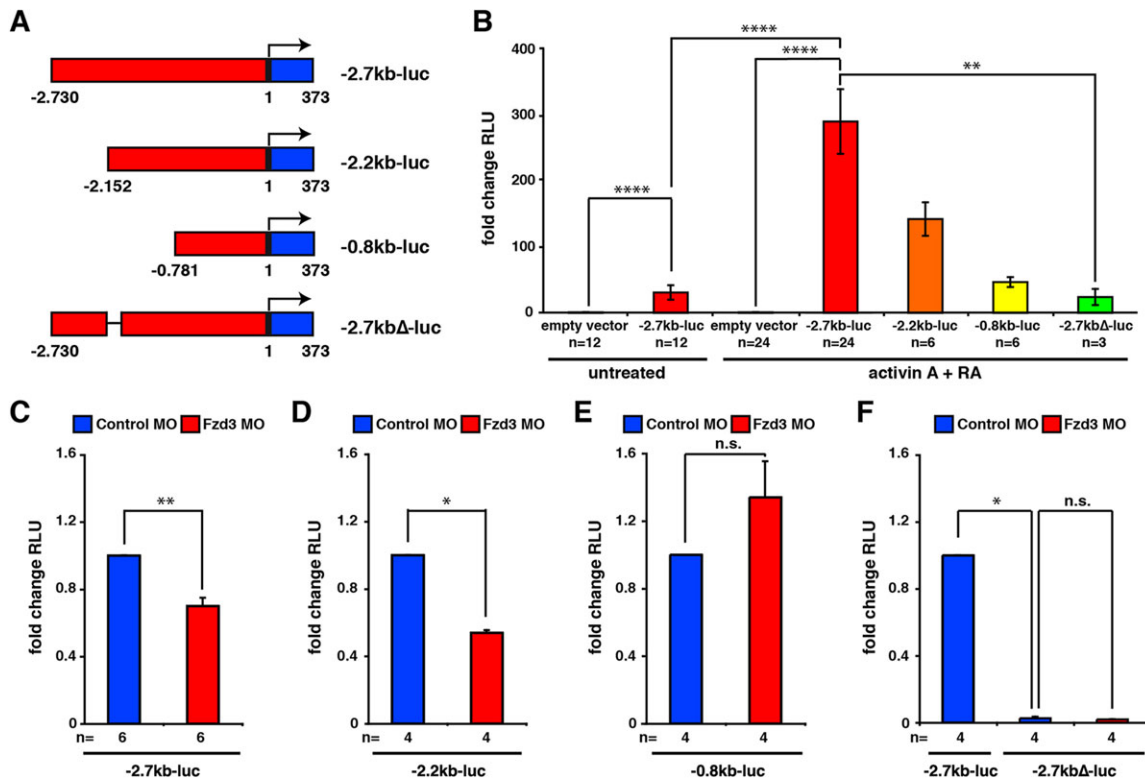

**Fig. 5. Identification of a Fzd3-responsive element in the *alcam* promoter.** (A) *alcam* reporter constructs generated in this study. Regulatory regions are linked to the luciferase gene as reporter. (B) The  $-2.7$  kb fragment is active in untreated and in activin A/retinoic acid (RA)-treated *Xenopus* animal cap explants. The  $-2.7$  kb fragment is active in pronephric animal cap cells, whereas the  $-2.2$  kb,  $-0.8$  kb and  $-2.7$  kb $\Delta$  fragments show considerable lower activities. (C) The activity of the  $-2.7$  kb fragment is reduced upon Fzd3 MO injection. (D) The  $-2.2$  kb fragment reacts to loss of Fzd3. (E) The  $-0.8$  kb fragment does not react to Fzd3 depletion. (F) Deleting a small part of the  $-2.7$  kb fragment is sufficient for loss of promoter activity. luc, luciferase reporter gene; n, number of independent experiments; RLU, relative light units; n.s., not significant. \* $P \leq 0.05$ , \*\* $P \leq 0.01$ , \*\*\*\* $P \leq 0.0001$ .

cell migration in *Alcam* morphant embryos will shed light onto this issue. It is also tempting to speculate that a loss of epithelial polarity upon loss of *Alcam* causes disturbed morphogenetic movements of the tubule, finally resulting in the observed phenotype. A detailed analysis of epithelial cell polarity will be required in the future to fully understand the *Alcam* MO phenotype at the cellular level.

### Wnt signaling during nephrogenesis

$\beta$ -Catenin-dependent and -independent Wnt pathways are important for kidney development.  $\beta$ -Catenin-dependent Wnt signaling was previously shown to be required for specification, differentiation and proliferation of pronephric cells, as well as ureteric bud formation (Iglesias et al., 2007; Lyons et al., 2009; Maretto et al.,

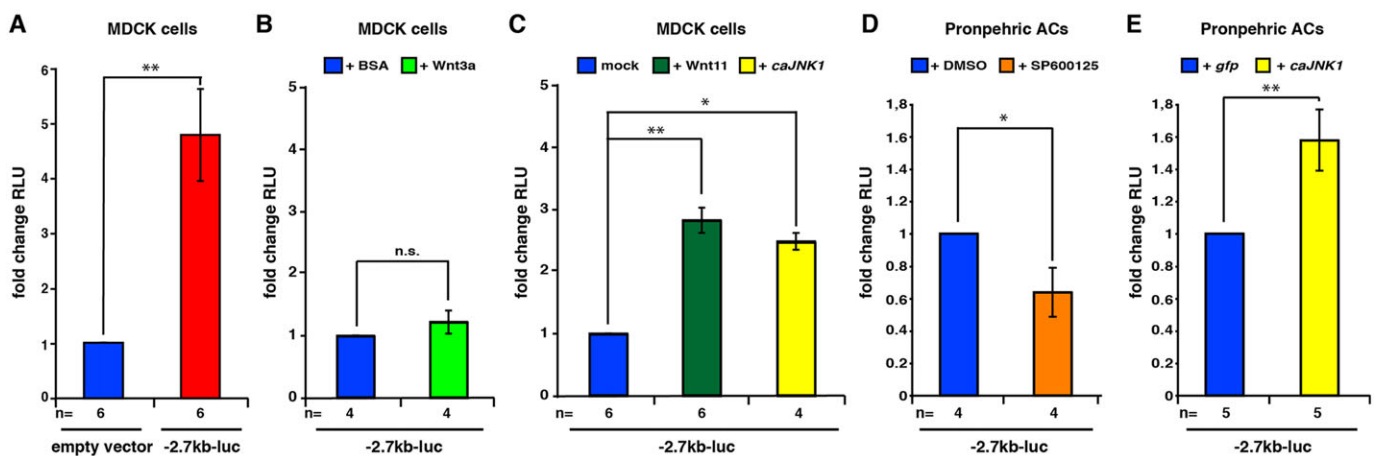

**Fig. 6. The *alcam* promoter is regulated through  $\beta$ -Catenin-independent Wnt in MDCK and AC cells.** (A) The  $-2.7$  kb fragment is active in MDCK cells. (B) The promoter does not respond to treatment of MDCK cells with Wnt3A. (C) The promoter responds to transfection of MDCK cells with Wnt11. Activity of the  $-2.7$  kb-luc reporter is increased upon co-transfection with *caJNK1*. (D,E) The promoter activity of the  $-2.7$  kb fragment is reduced by JNK inhibition (SP600125 treatment) (D), whereas the JNK overexpression leads to a significant upregulation of promoter activity (E) in activin A/retinoic acid-treated pronephric animal cap cells (ACs). n, number of independent experiments; luc, luciferase reporter gene; RLU, relative light units. \* $P \leq 0.05$ , \*\* $P \leq 0.01$ .

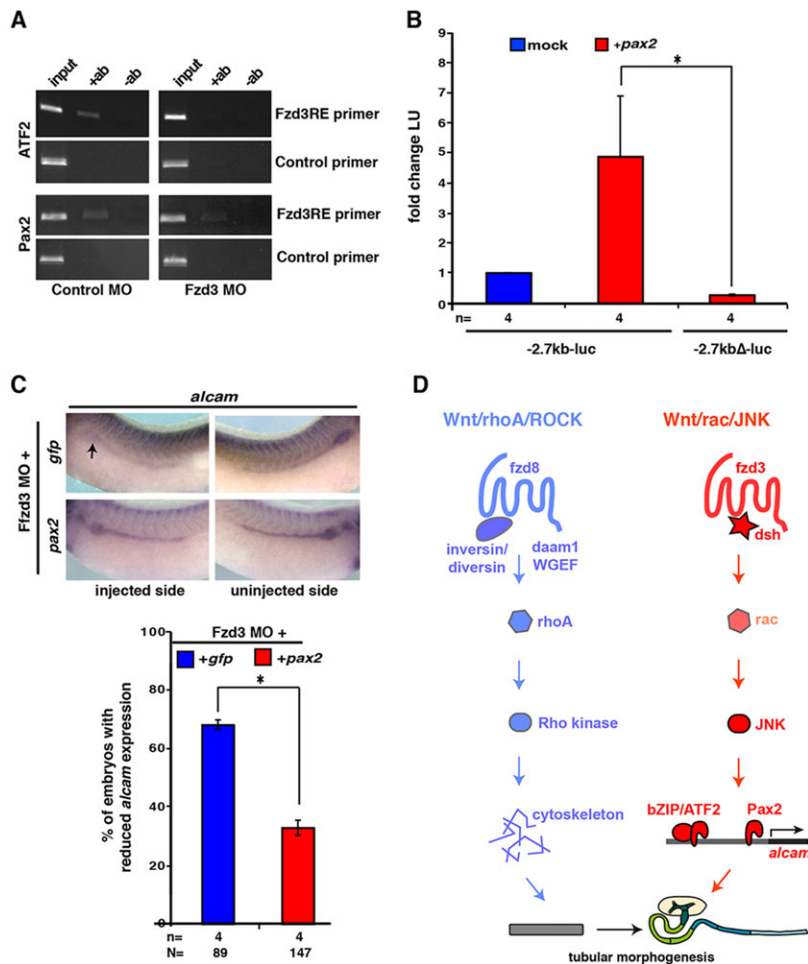

**Fig. 7. The Fzd3-responsive element (Fzd3RE) is regulated through Pax2 and ATF2.** (A) ATF2 and Pax2 bind to the –1752 to –2013 region, as shown by chromatin immunoprecipitation using a primer pair specific for the Fzd3RE (Fzd3RE primer). A primer pair matching part of the coding region of *alcam* serves as negative control (control primer). +ab, immunoprecipitation using either ATF2 or Pax2 antibody, as indicated; –ab, control reaction in the absence of antibody. Binding of ATF2 or Pax2 to the Fzd3RE is dependent on Fzd3 signaling, as shown by considerably weaker signals in the Fzd3 MO reactions. (B) The –2.7 kb-luc reporter responds to co-transfection of *pax2*. This regulation depends on the –1752 to –2013 region. (C) Downregulation of *alcam* expression upon loss of Fzd3 (arrow) is rescued by co-injecting *pax2* RNA. Lateral views with anterior towards the left (injected side) or towards the right (uninjected side) are shown. A quantitative representation of the experiment is shown. n, number of independent experiments; N, number of analyzed embryos in total; luc, luciferase reporter gene; RLU, relative light units. \* $P \leq 0.05$ . (D) Different  $\beta$ -Catenin-independent Wnt signaling branches are required for tubular morphogenesis. Left (blue): the Wnt/ROCK signaling pathway results in cytoskeletal rearrangement. Right (red): Wnt/JNK signaling directly activates *alcam* gene transcription involving ATF2 [as a heterodimer with other yet unknown bZIP (basic zipper) transcription factors] and Pax2.

2003; McCoy et al., 2011; Park et al., 2012).  $\beta$ -Catenin-independent Wnt7b and Wnt9 are important for tubule morphogenesis because of their ability to regulate asymmetric cell divisions (Yu et al., 2009) and convergent extension movements (Kärner et al., 2009).  $\beta$ -Catenin-independent Wnt4 is involved in murine metanephric tubulogenesis (Burn et al., 2011; Tanigawa et al., 2011). In line with these findings, the expression of *alcam* is not detectable during specification but is present during tubulogenesis. Work by others showed that Wnt/RhoA/ROCK signaling regulates morphogenetic movements. This pathway involves Fzd8, Inversin, Daam1, the Rho-GEF WGEF and RhoA, resulting in a reduced tubular convolute based on defects in cell migration (Lienkamp et al., 2010; Miller et al., 2011; Satow et al., 2004). These data suggest that  $\beta$ -Catenin-independent Wnt signaling regulates the cytoskeleton to ensure proper cell behavior in the proximal tubule (Fig. 7D). A more recent study indicated that this process is achieved by Myosin-dependent mediolateral cell intercalation (Lienkamp et al., 2012). Of relevance, neither loss of Fzd8 nor loss of Inversin affected *alcam* expression in our study, suggesting that the Wnt/ROCK signaling branch is not involved in *alcam* regulation. By contrast, we provide a novel mechanism showing that a Wnt/JNK/Alcam branch is required for tubulogenesis. At the molecular level, we found *alcam* to be regulated by Fzd3 signaling. Our data strongly support earlier findings (Gessert et al., 2008; Lapointe et al., 2012; Prieve and Moon, 2003), demonstrating that *alcam* is a direct target gene of  $\beta$ -Catenin-independent Wnt signaling at the transcriptional level. Therefore, we can add *alcam* to the currently very short list of two direct target genes

of  $\beta$ -Catenin-independent Wnt signaling in vertebrates: *eam2* (Maurus et al., 2005) and *pcdh8* (Schambony and Wedlich, 2007).

Our novel findings and earlier reports by others suggest that two independent non-canonical Wnt branches are required for proper nephrogenesis: (1) a Fzd8/Inversin branch required for cytoskeletal rearrangements (Lienkamp et al., 2010, 2012; Miller et al., 2011); and (2) a Fzd3/JNK branch regulating expression of the cell-adhesion molecule *alcam* (this study). This situation is remarkably similar to the situation during *Xenopus* gastrulation. During this process, it was shown that Wnt5a, but not Wnt11, regulates the expression of the cell-adhesion molecule *pcdh8* (PAPC) at the transcriptional level, whereas Wnt11 likely regulates the actin cytoskeleton (Schambony and Wedlich, 2007). Earlier studies also revealed an antagonism of  $\beta$ -Catenin-dependent and -independent Wnt signaling with respect to regulation of cell proliferation in the pronephros (McCoy et al., 2011). The exact mediators of non-canonical Wnt signaling in this context have not been determined yet but might include CamKII or NF-AT, which can both antagonize Wnt/ $\beta$ -Catenin signaling (Kühl et al., 2000; Saneyoshi et al., 2002). Taken together, a complex picture concerning the role of Wnt signaling during nephrogenesis is emerging. It will be of interest to determine whether and how these signaling branches are interconnected during this process.

Our study provides the first promoter analysis of a direct target gene of  $\beta$ -Catenin-independent Wnt signaling. It will be of interest to identify other target genes of Fzd3 in pronephric tissue and to analyze whether the regulation of these genes also involves a similar Fzd3-responsive element. Further work will be required to analyze



the regulation of *alcam* by ATF2. As ATF2 does not function as a homodimer but requires the formation of heterodimers with other bZIP (basic zipper) transcription factors (Bhounik and Ronai, 2008), the identification of ATF2 interaction partners in the pronephros will be highly relevant.

Interestingly, we also found Pax2 and ATF2 sites in the *alcam* promoter of mouse and human origin approximately 1.9 kb upstream of the transcription start point (data not shown). This suggests that the regulation of *Alcam* through non-canonical Wnt signaling might be conserved cross-species. Our findings should foster work into this direction. Of note, a detailed expression analysis revealed the presence of *Fzd3* during murine tubulogenesis (Diez-Roux et al., 2011), suggesting a conserved regulation of *Alcam* by *Fzd3*. However, *Fzd3*<sup>-/-</sup> mice do not have a kidney phenotype (Luyten et al., 2010; Wang et al., 2002), which might be because *Fzd3* has been shown to act redundantly with *Fzd6* in several processes, including neural tube closure, auditory hair cell orientation and eyelid closure (Wang et al., 2006; Wang and Nathans, 2007). In line with this, *Fzd6* expression has been described in the proximal tubule of the murine metanephros (Diez-Roux et al., 2011) and in the human fetal kidney (Tokuhara et al., 1998).

Taken together, our novel findings support the notion that *alcam* is a direct target gene of Wnt/JNK signaling.

## MATERIALS AND METHODS

More detailed experimental procedures are provided in the supplementary material.

### Animals

*Xenopus* embryos were staged as described previously (Nieuwkoop and Faber, 1994). All experiments using *Xenopus* were performed in agreement with the German law.

### Morpholino oligonucleotide (MO), RNA and plasmid injections

Antisense morpholino oligonucleotides (MOs) were obtained from Gene Tools (OR, USA). *Alcam*, *Wnt4* and *Fzd3* MOs were used as previously described (Cha et al., 2007; Dearthoff et al., 2001; Gessert et al., 2008; Saulnier et al., 2002). To target pronephric tissue, the V2 blastomere in eight-cell stage embryos was injected (Huang et al., 1998; Moody and Kline, 1990) with 20 ng of *Alcam* MO, 10 ng *Wnt4* MO or 15 ng of *Fzd3* MO. As a control, the standard Control MO from Gene Tools was used. *gfp* mRNA (0.5 ng) was injected as a lineage tracer. To test the efficiency of the *Alcam* MO to interfere with the translation of *Alcam*, we bilaterally injected 80 ng *Alcam* MO into two-cell stage *Xenopus* embryos (reflecting the *Alcam* MO amount injected unilaterally at the eight-cell stage) and performed Freon extraction and western blotting (Bugner et al., 2011) using polyclonal anti-*Alcam* (Sigma) and anti- $\beta$ -Tubulin antibodies (Serotec, clone YL1/2). *caJNK1* was obtained from Addgene (*pcDNA3FlagMkk7B2Jnk1a1*). The insert was transferred into pCS2+. All cloned plasmids were verified by sequencing. For rescue experiments, the following amounts of RNA were injected: 1 ng *alcam* (Gessert et al., 2008), 50–100 pg *dsh $\Delta$ DEP* or *dsh $\Delta$ DIX* (Miller et al., 1999), and 1 ng *caJNK1* or 10–50 pg *pax2* (Koenig et al., 2010). For animal cap (AC) dissections, embryos were injected bilaterally into the animal pole at the two-cell stage with 100 pg of the corresponding *alcam* regulatory region constructs or the luciferase reporter vector pGL3 basic (Promega), together with 5 pg of the Renilla luciferase construct phRL-TK (Promega) and the above-mentioned MO concentrations. ACs were dissected at stage 9. To induce pronephric tissue, explants were cultivated for 3 h with retinoic acid (10<sup>-4</sup> M) and activin A (10 ng/ml), and analyzed at stage 28. For JNK inhibition, ACs were incubated in 1  $\times$  MBSH/Pen/Strep supplied with 30  $\mu$ M SP600125 (JNK inhibition) or DMSO (Control experiment) until stage 28.

### In situ hybridizations

Whole-mount *in situ* hybridization and embryo sections were carried out as described previously (Gessert et al., 2007; Hemmati-Brivanlou et al., 1990).

### Semi-quantitative RT-PCR

Total RNA was isolated from ACs and reversed transcribed using random primers and Superscript II Reverse Transcriptase (Invitrogen). Semi-quantitative RT-PCR was performed using the Phire Hot Start II PCR Master Mix (Finnzymes).

### 5'RACE, *alcam* promoter isolation and cloning of deletion constructs

The complete 5'UTR of *Xenopus laevis*, *alcam* was isolated by 5'RACE using the GeneRacer Kit (Invitrogen). To identify the upstream regulatory region, a genomic *Xenopus* Lambda Fix II phage library (Stratagene) and an *alcam*-specific DNA probe were used. To analyze the 5'UTR upstream regulatory region of *alcam*, a 3.1 kb fragment (5'UTR and the regulatory region 2.7 kb upstream of the transcription start site) was cloned into pGL3 basic (Promega), generating  $-2.7$  kb-luc. Deletion constructs were cloned by inverse PCR using the  $-2.7$  kb-luc plasmid as a template. Constructs were amplified using Pfu Ultra II DNA Polymerase (Stratagene) or Phusion DNA Polymerase (Finnzymes) and re-ligated with Ligate-IT Rapid Ligation Kit (USB). All cloned plasmids were verified by sequencing.

### Luciferase assay

HEK293 or MDCK cells were transfected with promoter-luc together with the Renilla luciferase vector phRL-TK (Promega) and 0.1  $\mu$ g/well of *caJNK1/pCS2+*, *caNFAT/pCS2+*, *caCAMKII/pCS2+*, *Wnt-11/pCMV2* or *pax2*, then lysed after 24 h or 30 h (*pax2*, *Wnt11*). For *Wnt3a* treatment, cells were incubated for 10 h with 200 ng/ml *Wnt3a* (R&D). BIO (Calbiochem) treatment carried out for 24 h with 5  $\mu$ M BIO or DMSO as control. For control experiments, 0.2  $\mu$ g/well Super8xTOPFlash vector was co-transfected with phRL-TK (0.05  $\mu$ g/well, Promega) and treated with *Wnt3a* or BIO. Luciferase activity was determined using the Dual-Luciferase Reporter Assay System (Promega).

### Chromatin immunoprecipitation

ACs were fixed with formaldehyde and nuclei were collected by centrifugation. After lysis, sonication was performed using a Branson Sonifier 250. Immunoprecipitation was performed with ATF2 (Cell Signaling) or Pax2 antibodies (Abcam). DNA was purified using the PCR purification kit (Qiagen). PCR was performed using Phire Hot Start II PCR Master Mix (Finnzymes).

### Statistics

The nonparametric Mann-Whitney rank sum test was used to determine statistical differences (Prism, Version 5.0d, Irvine, USA). A *P* value  $\leq 0.05$  was considered to be significant. In all figures, statistical significances are indicated as: \**P* $\leq 0.05$ , \*\**P* $\leq 0.01$ , \*\*\**P* $\leq 0.001$  and \*\*\*\**P* $\leq 0.0001$ .

### Acknowledgements

We thank P. Dietmann, K. Botzenhart and A. Linnemann for excellent technical assistance, S. Vainio and A. S. Pfister for comments on the manuscript, and A. Borchers, R. T. Moon, A. Brändli, P. Vize, T. Pieler, W. Knöchel, D. Gradl and D. L. Shi for providing plasmids.

### Competing interests

The authors declare no competing financial interests.

### Author contributions

S.J.K. and M.K. designed experiments. W.C., A.T. and S.J.K. performed experiments. W.C., A.T., M.K. and S.J.K. evaluated data. M.K. and S.J.K. wrote the paper with input from W.C. and A.T.

### Funding

This work was supported by the Medical Faculty of Ulm University (Start up funding for young investigators to S.J.K.) and the DFG (SFB497, TpA6 to M.K.).

### Supplementary material

Supplementary material available online at <http://dev.biologists.org/lookup/suppl/doi:10.1242/dev.107938/-/DC1>

### References

Bhounik, A. and Ronai, Z. (2008). ATF2: a transcription factor that elicits oncogenic or tumor suppressor activities. *Cell Cycle* **7**, 2341–2345.

- Borchers, A., Fonar, Y., Frank, D. and Baker, J. C. (2006). XNF-ATc3 affects neural convergent extension. *Development* **133**, 1745-1755.
- Boutros, M., Paricio, N., Strutt, D. I. and Mlodzik, M. (1998). Dishevelled activates JNK and discriminates between JNK pathways in planar polarity and wingless signaling. *Cell* **94**, 109-118.
- Bugner, V., Tecza, A., Gessert, S. and Kuhl, M. (2011). Peter Pan functions independently of its role in ribosome biogenesis during early eye and craniofacial cartilage development in *Xenopus laevis*. *Development* **138**, 2369-2378.
- Burn, S. F., Webb, A., Berry, R. L., Davies, J. A., Ferrer-Vaquer, A., Hadjantonakis, A. K., Hastie, N. D. and Hohenstein, P. (2011). Calcium/NFAT signalling promotes early nephrogenesis. *Dev. Biol.* **352**, 288-298.
- Cai, Y., Lechner, M. S., Nihalani, D., Prindle, M. J., Holzman, L. B. and Dressler, G. R. (2002). Phosphorylation of Pax2 by the c-Jun N-terminal kinase and enhanced Pax2-dependent transcription activation. *J. Biol. Chem.* **277**, 1217-1222.
- Carroll, T. J. and Vize, P. D. (1999). Synergism between Pax-8 and lim-1 in embryonic kidney development. *Dev. Biol.* **214**, 46-59.
- Cha, J. Y., Birsoy, B., Kofron, M., Mahoney, E., Lang, S., Wylie, C. and Heasman, J. (2007). The role of FoxC1 in early *Xenopus* development. *Dev. Dyn.* **236**, 2731-2741.
- Choe, C. P., Collazo, A., Trinh, L. A., Pan, L., Moens, C. B. and Crump, J. G. (2013). Wnt-dependent epithelial transitions drive pharyngeal pouch formation. *Dev. Cell* **24**, 296-309.
- Corbel, C., Pourquie, O., Cormier, F., Vaigot, P. and Le Douarin, N. M. (1996). BEN/SC1/DM-GRASP, a homophilic adhesion molecule, is required for in vitro myeloid colony formation by avian hemopoietic progenitors. *Proc. Natl. Acad. Sci. U.S.A.* **93**, 2844-2849.
- Deardorff, M. A., Tan, C., Saint-Jeannet, J. P. and Klein, P. S. (2001). A role for frizzled 3 in neural crest development. *Development* **128**, 3655-3663.
- DeBernardo, A. P. and Chang, S. (1996). Heterophilic interactions of DM-GRASP: GRASP-NgCAM interactions involved in neurite extension. *J. Cell. Biol.* **133**, 657-666.
- Diez-Roux, G., Banfi, S., Sultan, M., Geffers, L., Anand, S., Rozado, D., Magen, A., Canidio, E., Pagani, M., Peluso, I. et al. (2011). A high-resolution anatomical atlas of the transcriptome in the mouse embryo. *PLoS Biol.* **9**, e1000582.
- Dressler, G. R. (2006). The cellular basis of kidney development. *Annu. Rev. Cell Dev. Biol.* **22**, 509-529.
- Fischer, E., Legue, E., Doyen, A., Nato, F., Nicolas, J.-F., Torres, V., Yaniv, M. and Pontoglio, M. (2006). Defective planar cell polarity in polycystic kidney disease. *Nat. Genet.* **38**, 21-23.
- Gessert, S., Maurus, D., Rössner, A. and Kuhl, M. (2007). Pescadillo is required for *Xenopus laevis* eye development and neural crest migration. *Dev. Biol.* **310**, 99-112.
- Gessert, S., Maurus, D., Brade, T., Walther, P., Pandur, P. and Kuhl, M. (2008). DM-GRASP/ALCAM/CD166 is required for cardiac morphogenesis and maintenance of cardiac identity in first heart field derived cells. *Dev. Biol.* **321**, 150-161.
- Hemmati-Brivanlou, A., Frank, D., Bolce, M. E., Brown, B. D., Sive, H. L. and Harland, R. M. (1990). Localization of specific mRNAs in *Xenopus* embryos by whole-mount in situ hybridization. *Development* **110**, 325-330.
- Huang, S., Johnson, K. E. and Wang, H. Z. P. (1998). Blastomeres show differential fate changes in 8-cell *Xenopus laevis* embryos that are rotated 90 degrees before first cleavage. *Dev. Growth Differ.* **40**, 189-198.
- Iglesias, D. M., Hueber, P.-A., Chu, L., Campbell, R., Patenaude, A.-M., Dziarmaga, A. J., Quinlan, J., Mohamed, O., Dufort, D. and Goodyer, P. R. (2007). Canonical WNT signaling during kidney development. *Am. J. Physiol. Renal. Physiol.* **293**, F494-F500.
- Itoh, K., Antipova, A., Ratcliffe, M. J. and Sokol, S. (2000). Interaction of dishevelled and *Xenopus* axin-related protein is required for wnt signal transduction. *Mol. Cell. Biol.* **20**, 2228-2238.
- Jannie, K. M., Stipp, C. S. and Weiner, J. A. (2012). ALCAM regulates motility, invasiveness, and adherens junction formation in uveal melanoma cells. *PLoS ONE* **7**, e39330.
- Karner, C. M., Chirumamilla, R., Aoki, S., Igarashi, P., Wallingford, J. B. and Carroll, T. J. (2009). Wnt9b signaling regulates planar cell polarity and kidney tubule morphogenesis. *Nat. Genet.* **41**, 793-799.
- Kestler, H. A. and Kuhl, M. (2008). From individual Wnt pathways towards a Wnt signalling network. *Philos. Trans. R. Soc. Lond. B Biol. Sci.* **363**, 1333-1347.
- Kishida, S., Yamamoto, H., Hino, S., Ikeda, S., Kishida, M. and Kikuchi, A. (1999). DIX domains of Dvl and axin are necessary for protein interactions and their ability to regulate beta-catenin stability. *Mol. Cell. Biol.* **19**, 4414-4422.
- Kispert, A., Vainio, S. and McMahon, A. P. (1998). Wnt-4 is a mesenchymal signal for epithelial transformation of metanephric mesenchyme in the developing kidney. *Development* **125**, 4225-4234.
- Koenig, S. F., Brentle, S., Hamdi, K., Fichtner, D., Wedlich, D. and Gradl, D. (2010). En2, Pax2/5 and Tcf-4 transcription factors cooperate in patterning the *Xenopus* brain. *Dev. Biol.* **340**, 318-328.
- Kühl, M., Sheldahl, L. C., Malbon, C. C. and Moon, R. T. (2000). Ca(2+)-calmodulin-dependent protein kinase II is stimulated by Wnt and Frizzled homologs and promotes ventral cell fates in *Xenopus*. *J. Biol. Chem.* **275**, 12701-12711.
- Lancaster, M. A. and Gleeson, J. G. (2010). Cystic kidney disease: the role of Wnt signaling. *Trends Mol. Med.* **16**, 349-360.
- Lapointe, E., Boyer, A., Rico, C., Paquet, M., Franco, H. L., Gossen, J., Demayo, F. J., Richards, J. S. and Boerboom, D. (2012). FZD1 regulates cumulus expansion genes and is required for normal female fertility in mice. *Biol. Reprod.* **87**, 104.
- Lei, K., Nimnual, A., Zong, W.-X., Kennedy, N. J., Flavell, R. A., Thompson, C. B., Bar-Sagi, D. and Davis, R. J. (2002). The Bax subfamily of Bcl2-related proteins is essential for apoptotic signal transduction by c-Jun NH(2)-terminal kinase. *Mol. Cell. Biol.* **22**, 4929-4942.
- Li, L., Yuan, H., Xie, W., Mao, J., Caruso, A. M., McMahon, A., Sussman, D. J. and Wu, D. (1999). Dishevelled proteins lead to two signaling pathways. Regulation of LEF-1 and c-Jun N-terminal kinase in mammalian cells. *J. Biol. Chem.* **274**, 129-134.
- Lienkamp, S., Ganner, A., Boehlke, C., Schmidt, T., Arnold, S. J., Schafer, T., Romaker, D., Schuler, J., Hoff, S., Powelske, C. et al. (2010). Inversin relays Frizzled-8 signals to promote proximal pronephros development. *Proc. Natl. Acad. Sci. U.S.A.* **107**, 20388-20393.
- Lienkamp, S. S., Liu, K., Karner, C. M., Carroll, T. J., Ronneberger, O., Wallingford, J. B. and Walz, G. (2012). Vertebrate kidney tubules elongate using a planar cell polarity-dependent, rosette-based mechanism of convergent extension. *Nat. Genet.* **44**, 1382-1387.
- Luyten, A., Su, X., Gondela, S., Chen, Y., Rompani, S., Takakura, A. and Zhou, J. (2010). Aberrant regulation of planar cell polarity in polycystic kidney disease. *J. Am. Soc. Nephrol.* **21**, 1521-1532.
- Lyons, J. P., Miller, R. K., Zhou, X., Weidinger, G., Deroo, T., Denayer, T., Park, J.-I., Ji, H., Hong, J. Y., Li, A. et al. (2009). Requirement of Wnt/beta-catenin signaling in pronephric kidney development. *Mech. Dev.* **126**, 142-159.
- Lyuksyutova, A. I., Lu, C.-C., Milanesio, N., King, L. A., Guo, N., Wang, Y., Nathans, J., Tessier-Lavigne, M. and Zou, Y. (2003). Anterior-posterior guidance of commissural axons by Wnt-frizzled signaling. *Science* **302**, 1984-1988.
- Maretto, S., Cordenonsi, M., Dupont, S., Braghetta, P., Broccoli, V., Hassan, A. B., Volpin, D., Bressan, G. M. and Piccolo, S. (2003). Mapping Wnt/beta-catenin signaling during mouse development and in colorectal tumors. *Proc. Natl. Acad. Sci. U.S.A.* **100**, 3299-3304.
- Maurus, D., Héligon, C., Bürger-Schwärzler, A., Brändli, A. W. and Kuhl, M. (2005). Noncanonical Wnt-4 signaling and EAF2 are required for eye development in *Xenopus laevis*. *EMBO J.* **24**, 1181-1191.
- McCoy, K. E., Zhou, X. and Vize, P. D. (2011). Non-canonical wnt signals antagonize and canonical wnt signals promote cell proliferation in early kidney development. *Dev. Dyn.* **240**, 1558-1566.
- Merkel, C. E., Karner, C. M. and Carroll, T. J. (2007). Molecular regulation of kidney development: is the answer blowing in the Wnt? *Pediatr. Nephrol.* **22**, 1825-1838.
- Miller, J. R., Rowning, B. A., Larabell, C. A., Yang-Snyder, J. A., Bates, R. L. and Moon, R. T. (1999). Establishment of the dorsal-ventral axis in *Xenopus* embryos coincides with the dorsal enrichment of dishevelled that is dependent on cortical rotation. *J. Cell Biol.* **146**, 427-437.
- Miller, R. K., de la Torre Canny, S. G., Jang, C.-W., Cho, K., Ji, H., Wagner, D. S., Jones, E. A., Habas, R. and McCrea, P. D. (2011). Pronephric tubulogenesis requires Daam1-mediated planar cell polarity signaling. *J. Am. Soc. Nephrol.* **22**, 1654-1664.
- Moody, S. A. and Kline, M. J. (1990). Segregation of fate during cleavage of frog (*Xenopus laevis*) blastomeres. *Anat. Embryol. (Berl)* **182**, 347-362.
- Naylor, R. W. and Jones, E. A. (2009). Notch activates Wnt-4 signalling to control medio-lateral patterning of the pronephros. *Development* **136**, 3585-3595.
- Nieuwkoop, P. D. and Faber, N. (1994). *Normal Table of Xenopus laevis (Daudin)*. New York: Garland.
- Otto, E. A., Schermer, B., Obara, T., O'Toole, J. F., Hiller, K. S., Mueller, A. M., Ruf, R. G., Hoefele, J., Beekmann, F., Landau, D. et al. (2003). Mutations in INVS encoding inversin cause nephronophthisis type 2, linking renal cystic disease to the function of primary cilia and left-right axis determination. *Nat. Genet.* **34**, 413-420.
- Park, J.-S., Ma, W., O'Brien, L. L., Chung, E., Guo, J.-J., Cheng, J. G., Valerius, M. T., McMahon, J. A., Wong, W. H. and McMahon, A. P. (2012). Six2 and Wnt regulate self-renewal and commitment of nephron progenitors through shared gene regulatory networks. *Dev. Cell* **23**, 637-651.
- Prieve, M. G. and Moon, R. T. (2003). Stromelysin-1 and mesothelin are differentially regulated by Wnt-5a and Wnt-1 in C57mg mouse mammary epithelial cells. *BMC Dev. Biol.* **3**, 2.
- Raciti, D., Reggiani, L., Geffers, L., Jiang, Q., Bacchion, F., Subrizi, A. E., Clements, D., Tindal, C., Davidson, D. R., Kaissling, B. et al. (2008). Organization of the pronephric kidney revealed by large-scale gene expression mapping. *Genome Biol.* **9**, R84.
- Ryffel, G. U. (2003). What can a frog tell us about human kidney development. *Nephron Exp. Nephrol.* **94**, e35-e43.

- Saneyoshi, T., Kume, S., Amasaki, Y. and Mikoshiba, K.** (2002). The Wnt/calcium pathway activates NF-AT and promotes ventral cell fate in *Xenopus* embryos. *Nature* **417**, 295-299.
- Satow, R., Chan, T.-c. and Asashima, M.** (2004). The role of *Xenopus* frizzled-8 in pronephric development. *Biochem. Biophys. Res. Commun.* **321**, 487-494.
- Saulnier, D. M., Ghanbari, H. and Brandli, A. W.** (2002). Essential function of Wnt-4 for tubulogenesis in the *Xenopus* pronephric kidney. *Dev. Biol.* **248**, 13-28.
- Schambony, A. and Wedlich, D.** (2007). Wnt-5A/Ror2 regulate expression of XPAPC through an alternative noncanonical signaling pathway. *Dev. Cell* **12**, 779-792.
- Schulte, G.** (2010). International Union of Basic and Clinical Pharmacology. LXXX. The class Frizzled receptors. *Pharmacol. Rev.* **62**, 632-667.
- Shi, D.-L., Goisset, C. and Boucaut, J.-C.** (1998). Expression of Xfz3, a *Xenopus* frizzled family member, is restricted to the early nervous system. *Mech. Dev.* **70**, 35-47.
- Stark, K., Vainio, S., Vassileva, G. and McMahon, A. P.** (1994). Epithelial transformation of metanephric mesenchyme in the developing kidney regulated by Wnt-4. *Nature* **372**, 679-683.
- Tanigawa, S., Wang, H., Yang, Y., Sharma, N., Tarasova, N., Ajima, R., Yamaguchi, T. P., Rodriguez, L. G. and Perantoni, A. O.** (2011). Wnt4 induces nephronic tubules in metanephric mesenchyme by a non-canonical mechanism. *Dev. Biol.* **352**, 58-69.
- Tecza, A., Bugner, V., Kühl, M. and Kühl, S. J.** (2011). Pescadillo homologue 1 and Peter Pan function during *Xenopus laevis* pronephros development. *Biol. Cell* **103**, 483-498.
- Tokuhara, M., Hirai, M., Atomi, Y., Terada, M. and Katoh, M.** (1998). Molecular cloning of human Frizzled-6. *Biochem. Biophys. Res. Commun.* **243**, 622-627.
- Tsukamoto, Y., Namikawa, T., Tatesaki, R., Kotani, T. and Tanaka, H.** (2006). Expression and adhesive activity of SC1, an Ig superfamily cell adhesion molecule, in sporadic nephroblastomas of chicken. *Oncol. Rep.* **15**, 137-141.
- Wang, Y. and Nathans, J.** (2007). Tissue/planar cell polarity in vertebrates: new insights and new questions. *Development* **134**, 647-658.
- Wang, Y., Thekdi, N., Smallwood, P. M., Macke, J. P. and Nathans, J.** (2002). Frizzled-3 is required for the development of major fiber tracts in the rostral CNS. *J. Neurosci.* **22**, 8563-8573.
- Wang, Y., Guo, N. and Nathans, J.** (2006). The role of Frizzled3 and Frizzled6 in neural tube closure and in the planar polarity of inner-ear sensory hair cells. *J. Neurosci.* **26**, 2147-2156.
- Yu, J., Carroll, T. J., Rajagopal, J., Kobayashi, A., Ren, Q. and McMahon, A. P.** (2009). A Wnt7b-dependent pathway regulates the orientation of epithelial cell division and establishes the cortico-medullary axis of the mammalian kidney. *Development* **136**, 161-171.
